# Supplementary material for: IntLIM: integration using linear models of metabolomics and gene expression data
Source: PubMed Central journal article supplement (PMC5838881; doi:10.1186/s12859-018-2085-6), 2018-03-05
Supplement: 12859_2018_2085_MOESM1_ESM.pdf [file 12859_2018_2085_MOESM1_ESM.pdf]

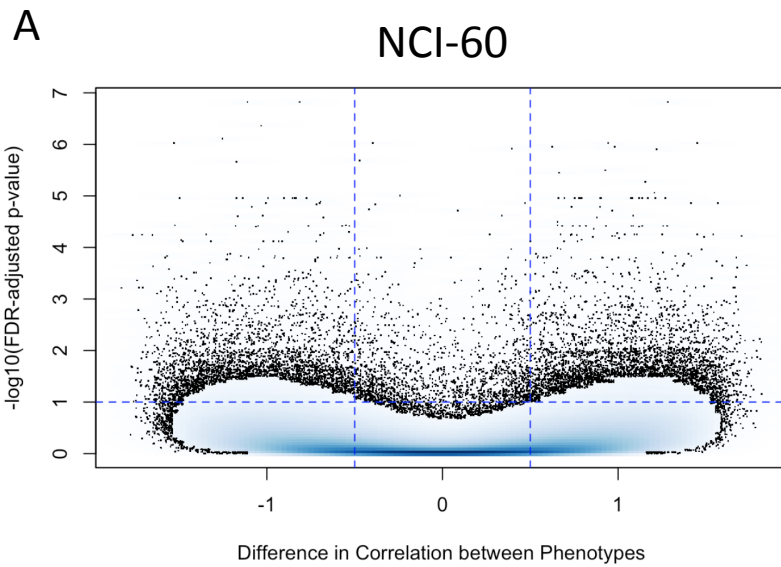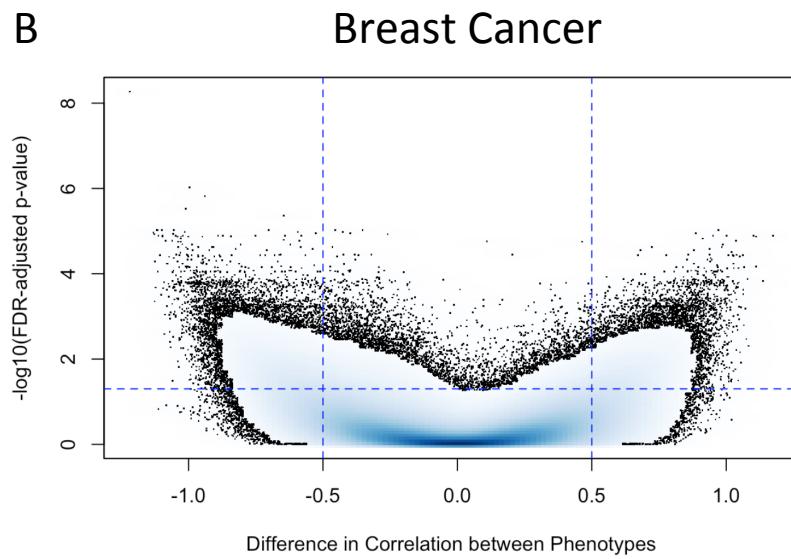

**Figure S3:** “Volcano plots” of Spearman correlation differences vs. FDR- adjusted p-values (of interaction term in linear model, see Methods) for A) NCI-60 cell line analysis and B) breast cancer data analysis.
