# Supplementary material for: IntLIM: integration using linear models of metabolomics and gene expression data
Source: PubMed Central journal article supplement (PMC5838881; doi:10.1186/s12859-018-2085-6), 2018-03-05
Supplement: 12859_2018_2085_MOESM5_ESM.pdf [file 12859_2018_2085_MOESM5_ESM.pdf]

**Table S1: NCI-60 Data pathway analysis results of genes.** Ingenuity Pathway Analysis Canonical Pathways from Genes involved in Gene-Metabolite Pairs of the Leukemia Correlated Cluster and Leukemia Anti-Correlated Cluster. P-values are all calculated from right-tailed Fisher's Exact Test.

| <u>Leukemia Correlated Cluster</u>                                  |                |                  | <u>Leukemia Anti-Correlated Cluster</u>  |                |                  |
|---------------------------------------------------------------------|----------------|------------------|------------------------------------------|----------------|------------------|
| <b>Pathway</b>                                                      | <b>p-value</b> | <b>Overlap</b>   | <b>Pathway</b>                           | <b>p-value</b> | <b>Overlap</b>   |
| Acute Phase Response Signaling                                      | 2.21E-04       | 6.5%<br>(11/170) | eNOS Signaling                           | 3.06E-04       | 5.5%<br>(10/181) |
| 1D-myo-inositol Hexakisphosphate Biosynthesis V (from Ins(1,3,4)P3) | 9.16E-04       | 66.7%<br>(2/3)   | CREB Signalling in Neurons               | 5.08E-04       | 5.2%<br>(10/193) |
| Hepatic Fibrosis/Hepatic Stellate Cell Activation                   | 1.55E-04       | 5.5%<br>(10/183) | dTMP De Novo Biosynthesis                | 9.55E-04       | 21.4%<br>(3/14)  |
| CDK5 Signaling                                                      | 1.84E-04       | 7.1%<br>(7/99)   | Huntington's Disease Signaling           | 1.02E-03       | 4.4%<br>(11/249) |
| PAK Signaling                                                       | 2.06E-04       | 6.9%<br>(7/101)  | P2Y Purigenic Receptor Signaling Pathway | 1.12E-03       | 5.6%<br>(8/143)  |
