# Supplementary material for: IntLIM: integration using linear models of metabolomics and gene expression data
Source: PubMed Central journal article supplement (PMC5838881; doi:10.1186/s12859-018-2085-6), 2018-03-05
Supplement: 12859_2018_2085_MOESM8_ESM.pdf [file 12859_2018_2085_MOESM8_ESM.pdf]

**Table S2: Breast Cancer Data pathway analysis results of genes.** Ingenuity Pathway Analysis Canonical Pathways from Genes involved in Gene-Metabolite Pairs of the Tumor Correlated Cluster and Tumor Anti-Correlated Cluster. P-values are all calculated from right-tailed Fisher's Exact Test.

| Tumor Correlated Cluster               |                |                   | Tumor Anti-Correlated Cluster                     |                |                  |
|----------------------------------------|----------------|-------------------|---------------------------------------------------|----------------|------------------|
| <i>Name</i>                            | <i>p-value</i> | <i>Overlap</i>    | <i>Name</i>                                       | <i>p-value</i> | <i>Overlap</i>   |
| Oxidative Phosphorylation              | 2.00E-15       | 16.5%<br>(18/109) | Hepatic Fibrosis/Hepatic Stellate Cell Activation | 1.21E-06       | 8.7%<br>(16/183) |
| Mitochondrial Dysfunction              | 4.98E-14       | 11.7%<br>(20/171) | FAK Signaling                                     | 3.56E-05       | 10.1%<br>(10/99) |
| Protein Ubiquitination Pathway         | 5.50E-04       | 4.2%<br>(11/265)  | Actin Cytoskeleton Signaling                      | 7.28E-05       | 6.6%<br>(15/227) |
| GDP-mannose Biosynthesis               | 2.27E-03       | 33.3%<br>(2/6)    | Signaling by Rho Family GTPases                   | 1.94E-04       | 6.0%<br>(15/248) |
| Pyridoxal 5'-phosphate Salvage Pathway | 9.01E-03       | 6.2%<br>(4/65)    | Circadian Rhythm Signaling                        | 5.18E-04       | 15.2%<br>(5/33)  |
