# Supplementary material for: IntLIM: integration using linear models of metabolomics and gene expression data
Source: PubMed Central journal article supplement (PMC5838881; doi:10.1186/s12859-018-2085-6), 2018-03-05
Supplement: 12859_2018_2085_MOESM9_ESM.pdf [file 12859_2018_2085_MOESM9_ESM.pdf]

**Table S3: Breast Cancer Data pathway analysis results of metabolites.** Ingenuity Pathway Analysis Canonical Pathways from Metabolites involved in Gene-Metabolite Pairs of the Tumor Correlated Cluster. P-values are all calculated from right-tailed Fisher's Exact Test.

| <b>Tumor Correlated Cluster</b>                          |                |                  | <b>Tumor Anti-Correlated Cluster</b>                     |                |                  |
|----------------------------------------------------------|----------------|------------------|----------------------------------------------------------|----------------|------------------|
| <b>Name</b>                                              | <b>p-value</b> | <b>Overlap</b>   | <b>Name</b>                                              | <b>p-value</b> | <b>Overlap</b>   |
| tRNA charging                                            | 1.33E-11       | 39.5%<br>(17/43) | tRNA charging                                            | 1.09E-11       | 41.9%<br>(18/43) |
| Purine Ribonucleosides Degradation to Ribose-1-phosphate | 8.77E-07       | 58.3%<br>(7/12)  | Superpathway of Citrulline Metabolism                    | 6.83E-05       | 33.3%<br>(8/24)  |
| Purine Nucleotides Degradation II (Aerobic)              | 1.71E-05       | 41.2%<br>(7/17)  | Urea Cycle                                               | 1.20E-04       | 42.9%<br>(6/14)  |
| Guanosine Nucleotides Degradation II                     | 1.01E-04       | 50.0%<br>(5/10)  | Purine Nucleotides Degradation II (Aerobic)              | 4.22E-04       | 35.3%<br>(6/17)  |
| Adenosine Nucleotides Degradation III                    | 1.78E-04       | 45.5%<br>(5/11)  | Purine Ribonucleosides Degradation to Ribose-1-phosphate | 5.50E-04       | 41.7%<br>(5/12)  |
